# Supplementary material for: Correlation of HAMP gene polymorphisms and expression with the susceptibility and length of hospital stays in Taiwanese children with Kawasaki disease
Source: PubMed Central journal article supplement (PMC5584296; doi:10.18632/oncotarget.17700), 2017-05-08
Supplement: oncotarget-08-51859-s001.pdf [file oncotarget-08-51859-s001.pdf]

## Correlation of *HAMP* gene polymorphisms and expression with the susceptibility and length of hospital stays in taiwanese children with kawasaki disease

### Supplementary Materials

**Supplementary Table 1: Basic characteristics of the tag single-nucleotide polymorphisms (SNPs) in *HAMP***

| Position on<br>Chromosome 19<br>(hg38) | Variant    | Ref | Alt | Allele frequency* |      |      |      |      | HWE               |
|----------------------------------------|------------|-----|-----|-------------------|------|------|------|------|-------------------|
|                                        |            |     |     | AFR               | AMR  | ASN  | EUR  | TWB  | ( <i>p</i> value) |
| 35767884                               | rs916145   | C   | G   | 0.06              | 0.05 | 0.35 | 0.12 | 0.35 | 0.837             |
| 35772899                               | rs10421768 | A   | G   | 0.19              | 0.18 | 0.01 | 0.23 | 0.01 | 0.857             |
| 35773146                               | rs3817623  | G   | T   | 0.00              | 0.00 | 0.06 | 0.00 | 0.06 | 0.674             |
| 35775441                               | rs7251432  | A   | G   | 0.25              | 0.48 | 0.37 | 0.48 | 0.38 | 0.172             |
| 35775626                               | rs2293689  | C   | T   | 0.05              | 0.03 | 0.09 | 0.01 | 0.10 | 0.571             |

Ref: reference allele, Alt: Alternative allele. \*Frequency of the Alt allele. AFR: African. AMR: Ad Mixed American. ASN: Asian. EUR: European. TWB: the Taiwan Biobank. HWE: Hardy-Weinberg equilibrium.
